# Supplementary material for: Synthesis of a novel perovskite-carbon aerogel hybrid adsorbent with multiple metal-Lewis active sites for the removal of dyes from water: experimental and DFT studies
Source: Royal Society of Chemistry journal article supplement (doi:10.1039/d2nj05646a), 2023-01-01
Supplement: d2nj05646a1.pdf [file d2nj05646a1.pdf]

## Supplementary Information

### **Synthesis of a novel perovskite-carbon aerogel hybrid adsorbent with multiple metal-Lewis active sites for the removal of dyes from water; experimental and DFT studies**

Daryoush Sanaei<sup>1</sup>, Mohammad Hadi Dehghani<sup>2,3</sup>, Hamidreza Sharifan<sup>4</sup>, Monika Jain<sup>5</sup>, Bahram Roshan<sup>1</sup>, Javier A. Arcibar-Orozco<sup>6\*</sup>, Vassilis J. Inglezakis<sup>7\*</sup>

<sup>1</sup>Department of Environmental Health Engineering, Faculty of Public Health and Safety, Shahid Beheshti University of Medical Sciences, Tehran, Iran

<sup>2</sup>Department of Environmental Health Engineering, School of Public Health, Tehran University of Medical Sciences, Tehran, Iran, Islamic Republic of

<sup>3</sup>Institute for Environmental research, Center for Solid Waste Research, Tehran University of Medical Sciences, Tehran, Iran, Islamic Republic of

<sup>4</sup>Department of Natural Science, Albany State University, Georgia, USA

<sup>5</sup> Department of Natural Resource Management, College of Forestry, Banda University of Agriculture and Technology, Banda- 210001

<sup>6</sup> Research Department, CIATEC A.C. Centro de Innovación Aplicada en Tecnologías Competitivas, León, Mexico

<sup>7</sup>Department of Chemical & Process Engineering, University of Strathclyde, Glasgow, UK

[vasileios.inglezakis@strath.ac.uk](mailto:vasileios.inglezakis@strath.ac.uk)

[Daryoushsanaei@gmail.com](mailto:Daryoushsanaei@gmail.com)

[hsharifan@tamu.edu](mailto:hsharifan@tamu.edu)

# 1. Experimental Section

## *Schematic explanation of the synthesis procedure of the DB-Perovskite/Cag Hybrid*

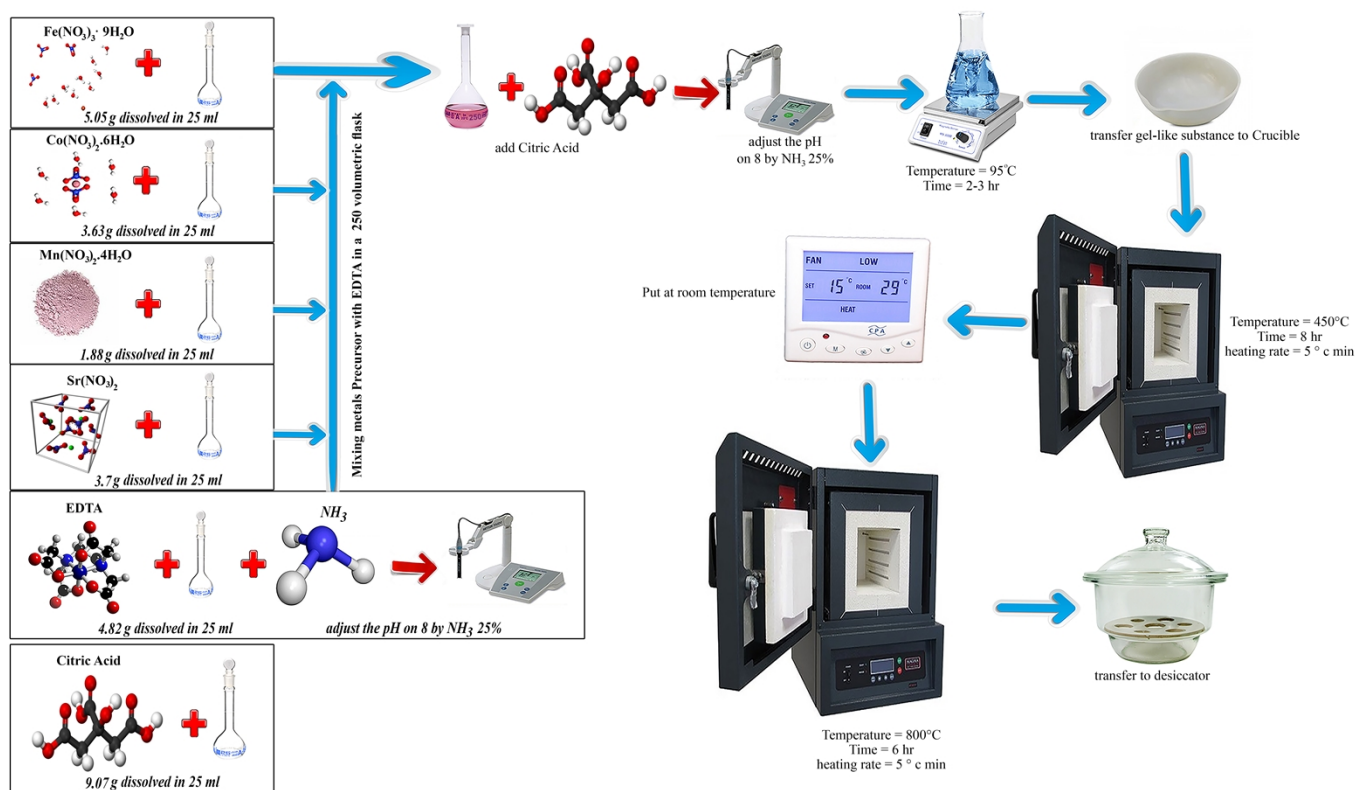

**Adsorbate preparation:** In this work, the adsorbates were two cationic dyes, crystal violet (CV) and acid yellow 17 (AY17), which were purchased from Sigma Aldrich. For experimental study, a stock dye solution ( $1\text{g L}^{-1}$ ) was prepared by dissolving it in Milli-Q water, which was used to prepare the aqueous solution of these dyes. The UV-Vis spectrophotometer was used to determine the concentration of dyes by measuring the absorbance of the aqueous solution at the maximum wavelength. For drawing the calibration curve for each dye using nine concentrations of dye solutions of range from  $0.1\text{ mg L}^{-1}$  to  $15.0\text{ mg L}^{-1}$ . To ensure the calibration curve, this step was repeated three times.  $K_a$  values of dyes were calculated using a standard method.

**Desorption and regeneration studies:** Desorption experiments were carried out to investigate the reversibility of CV and AY17 dyes from the DB-Perovskite/CAg Hybrid. The optimal values of adsorbent (0.05 g for CV and 0.1 g for AY17) were dissolved in 20 ml desorbing solvent 1 M HCl and HNO<sub>3</sub> for 24 h on a shaker. From UV-Vis spectrophotometer was used to measure the dyes desorbed. Regeneration studies were carried out to estimate the stability of DB-Perovskite/CAg Hybrid, for this purpose, the recovered adsorbent was dried at oven and then eluted with appropriate 1 M HCl and HNO<sub>3</sub> at 24 h and further regenerated in distilled water. Thereafter, the recycled DB-Perovskite/CAg Hybrid was used for the next adsorption experiments approximately, three adsorption cycles of adsorption-desorption process.

**Density functional theory (DFT):** The density functional theory (DFT) calculations carried out using The Vienna ab initio simulation package (VASP) with wave-based plane. Moreover, in order to explain the exchange-correlation, the general gradient approximation of Perdew-Burke-Ernzerhof (GGA-PBE) was used. A plane-wave basis of cut-off kinetic energy of 400 eV was performed to expand the smooth part of wave functions. A supercell with dimension of 5 \*5\*1 including 4 repeated units was used to simulate SA Fe-Mn/NH<sub>2</sub>-NHPCFB. For preventing periodic interaction, a 15 Å was used to set the vacuum layers. When the overall energy variation was smaller than 10<sup>-5</sup> eV and all forces on each atom were less than 0.01 eV Å<sup>-1</sup>, the relaxation of structures is stopped.

**Thermodynamics study:** To evaluate the impacts of temperature on CV and AY17 adsorption onto DB-Perovskite/CAg Hybrid and the nature of the adsorption process, the thermodynamic parameters, i.e., enthalpy ( $\Delta H^\circ$ ), the Gibbs free energy ( $\Delta G^\circ$ ), and entropy ( $\Delta S^\circ$ ), were investigated that calculated based to the following equations:

$$\Delta G^0 = - RT \ln k \quad (S1)$$

$$k = \frac{q_e}{C_e} \quad (S2)$$

$$\ln k = \frac{\Delta S^0}{R} - \frac{\Delta H^0}{RT} \quad (\text{S3})$$

Where  $k_T$  is the equilibrium coefficient,  $C_e$  is the equilibrium concentration ( $\text{mg L}^{-1}$ ),  $R$  is the universal gas constant ( $8.314 \text{ J mol}^{-1} \text{ K}^{-1}$ ); and  $T$  is the solution temperature (K).

**Adsorption isotherms:** The Langmuir model used to estimate the adsorption performance, the formation of monolayer of dyes molecules on the adsorbent surface and the maximum adsorption capacity ( $Q_m$ ) homogeneous surface of DB-Perovskite/CAG Hybrid due to adsorption process that written the linear and nonlinear forms it's as follows:

$$1/q_e = 1/Q_m + 1/k_L Q_m \cdot 1/C_e \quad (\text{S4})$$

$$q_e = \frac{Q_m K_L C_e}{1 + K_L C_e} \quad (\text{S5})$$

To describe heterogeneous adsorption and the behavior of a multilayer adsorption on the DB-Perovskite/CAG Hybrid surface, Freundlich isotherm was researched that obtained from the equation follows:

Linear form

$$\ln q_e = \ln k_F + 1/n \ln C_e \quad (\text{S6})$$

Non-linear form

$$q_e = k_F C_e^{\frac{1}{n}} \quad (\text{S7})$$

$K_F$  is The Freundlich adsorption capacity and  $n$  is represented of adsorption heterogeneity.

To understand the nature of adsorption process, Dubinin–Radushkevich (D–R) isotherm was carried out. The equation of D–R isotherm is shown as:

Linear form

$$\ln (q_e) = \ln (q_m) - \beta \varepsilon^2 \quad (\text{S8})$$

Non-linear

$$q_e = q_m \exp(-\beta \varepsilon^2) \quad (\text{S9})$$

Where  $\beta$  is model constant connected to mean the free adsorption energy,  $q_m$  is the adsorption capacity (max) (mg g<sup>-1</sup>), and  $\varepsilon$  is Polanyi potential of adsorption and is calculated as:

$$\varepsilon = RT \ln(1 + 1/C_e) \quad (\text{S10})$$

T is the temperature of room condition (K), and R is the general gas constant (8.314 J/mol k). The mean free energy of adsorption (E) is given below:

$$E = 1/\sqrt{2\beta} \quad (\text{S11})$$

We can use above equation to recognize the kind of adsorption process. In the values of E lower of 8 kJ mol<sup>-1</sup>, the dominated process in adsorption is physisorption, E values of 8 to 16 kJ mol<sup>-1</sup> is for ion-exchange and values of 20 to 40 kJ mol<sup>-1</sup> is chemisorption process. Temkin model make the assumption that there is an interaction between adsorbate-adsorbent that can be shown as heat of adsorption. The Temkin equation is calculated as:

Linear form

$$q_e = B_T \ln K_T + B_T \ln C_e \quad (\text{S12})$$

Non-linear

$$q_e = B_T (RT/b) \ln(K_T C_e) \quad (\text{S13})$$

Where  $K_T$  is the maximum binding energy-based equilibrium constant and  $B_T$  is related to heat of adsorption.

**Adsorption kinetics:** The linear and Non-linear equations of pseudo- first order, pseudo-second-order, and Elovich were determined as follows:

Linear form

$$\ln(q_e - q_t) = \ln(q_e) - k_1 \cdot t \quad (\text{S14})$$

$$\frac{t}{q_t} = \frac{1}{q_e^2 k_2} + \frac{1}{q_e} t \quad (\text{S15})$$

$$q_t = \frac{1}{\beta} \ln(\alpha\beta) + \frac{1}{\beta} \ln t$$

Non-linear form

$$\frac{dq_t}{dt} = k_1(q_e - q_t) \quad (\text{S16})$$

$$\frac{dq_t}{dt} = k_2(q_e - q_t)^2 \quad (\text{S17})$$

$$\frac{dq_t}{dt} = \alpha e^{-\beta q_t} \quad (\text{S18})$$

Where  $k_1$ ,  $k_2$ , and  $\alpha$  are the constant of pseudo-first, pseudo-second, and Elovich models, respectively. The  $\beta$  parameter is linked to the expanded coverage of surface and also activation energy for chemical adsorption ( $\text{g mg}^{-1}$ ).

To realize the adsorption of mechanisms, other models such as Boyd, Bangham, and intraparticle diffusion are also investigated.

Boyd:

$$F = 1 - \left(\frac{6}{\pi^2}\right) \exp\left(-Bt\right) \quad (\text{S19})$$

$$F = \frac{q_t}{q_e} \quad (\text{S20})$$

$$Bt = -0.4977 - \ln(1 - F) \quad (\text{S21})$$

Where F is the adsorbed dyes into DB-Perovskite/CAG Hybrid at different times, Bt is function of F and other parameters are recently mentioned.

Bangham:

$$\log\left(\frac{C_0}{C_0 - q_t m}\right) = \log\left(\frac{k_0 m}{2.303V}\right) + \alpha \log(t) \quad (\text{S22})$$

Where  $\alpha$  ( $<1$ ) and  $k_0$  are Bangham constants,  $m$  is the used adsorbent ( $\text{g L}^{-1}$ ),  $V$  is the volume of solution (mL) and other parameters are recently mentioned.

Intraparticle diffusion

$$q_t = k_{int}t^{1/2} + C \quad (\text{S23})$$

Where  $C$  and  $k_{int}$  are the intraparticle diffusion constant ( $\text{mg g}^{-1} \text{min}^{-1}$ ).

## 2. Supplementary Figures

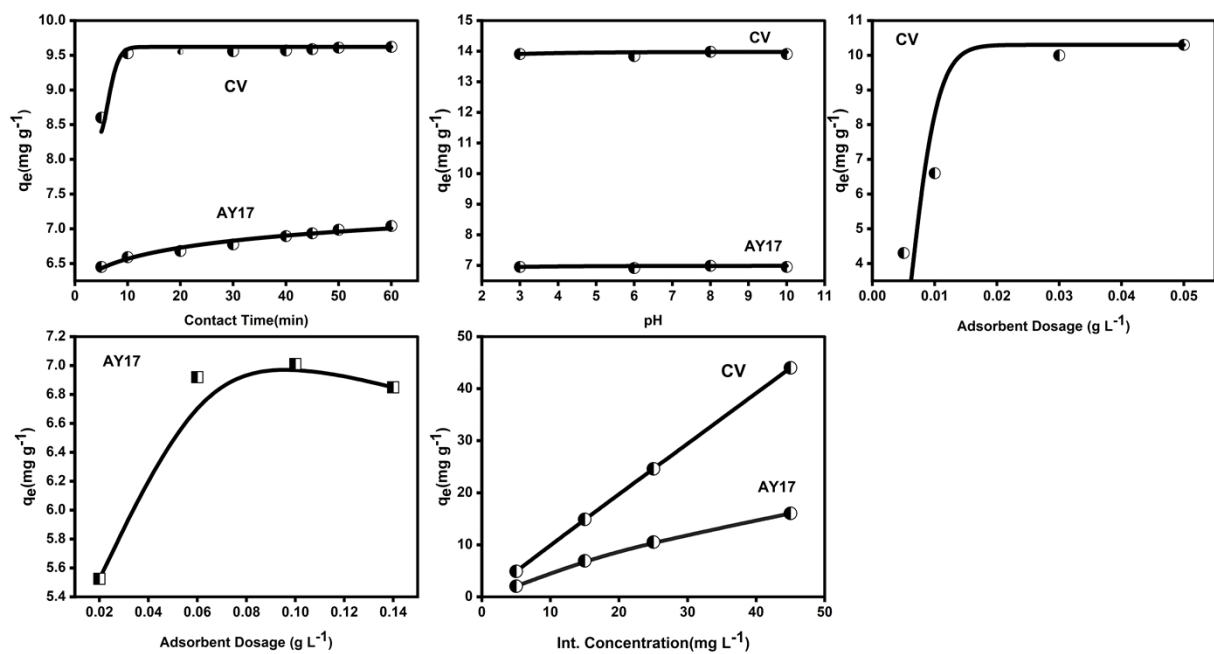

**Supplementary Figure 1:** the variable parameters influence on adsorption process in terms of a) time; b) initial concentration; c) adsorbent dosage; and d) pH.



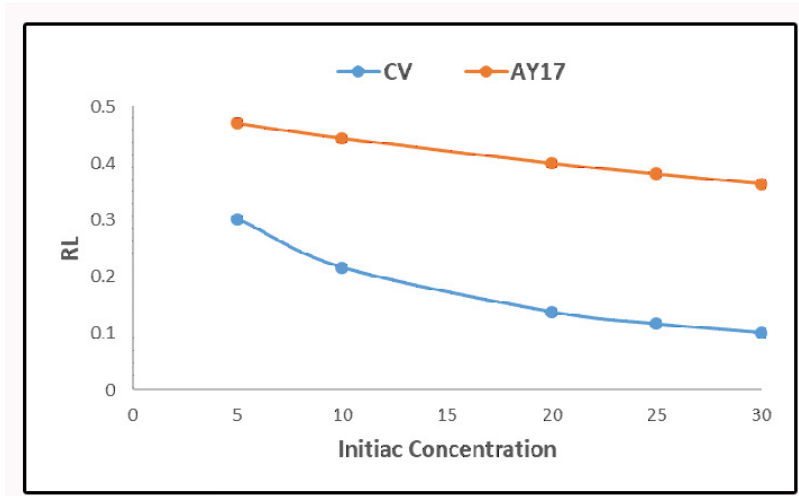

**Supplementary Figure 2:** Equilibrium parameter (Langmuir dimensionless) factor for DB-Perovskite/CAG Hybrid [pH (neutral); agitation speed (210 rpm); adsorbent dosage (0.1 g for AY17 and 0.05 g for CV; contact time (10 min for CV and 60 min for AY17); initial dyes concentration (5-40 mg L<sup>-1</sup>); volume of reaction (V = 50 mL); and temperature (25° C)].

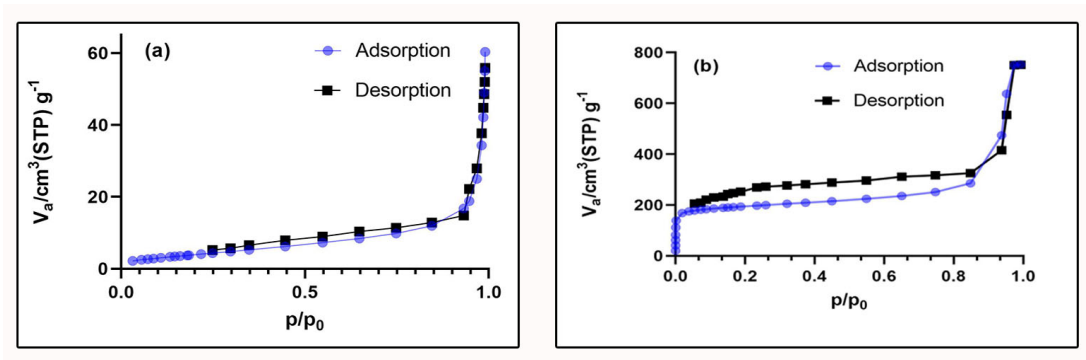

**Supplementary Figure 3:** Adsorption–desorption isotherms of nitrogen gas of (a) CAG and (b) DB-Perovskite/CAG Hybrid

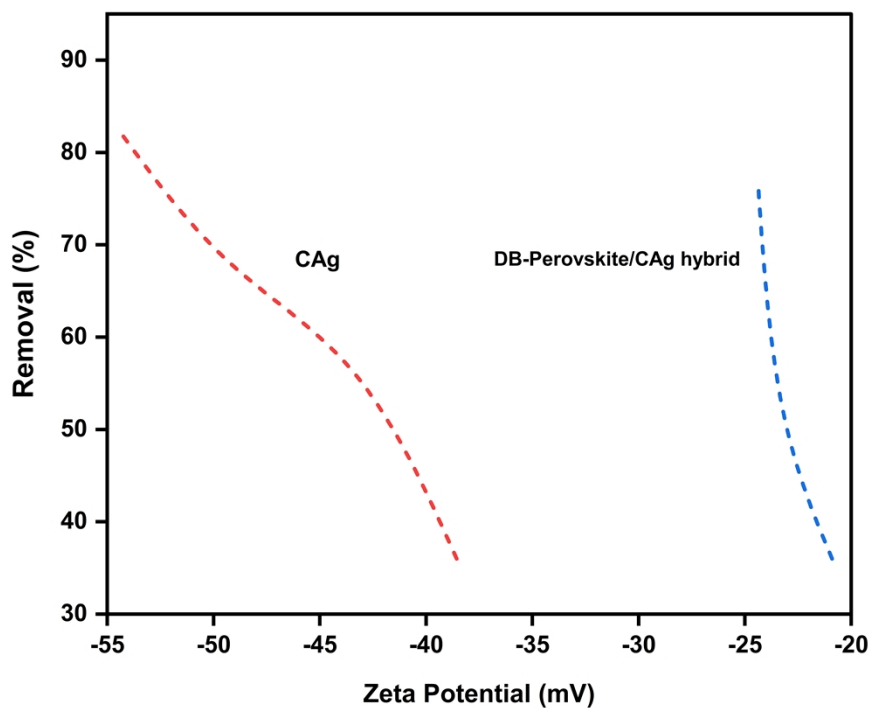

*Supplementary Figure 4: The performance of CV and AY17(co-adsorption) removal based on the corresponding Zeta Potential*

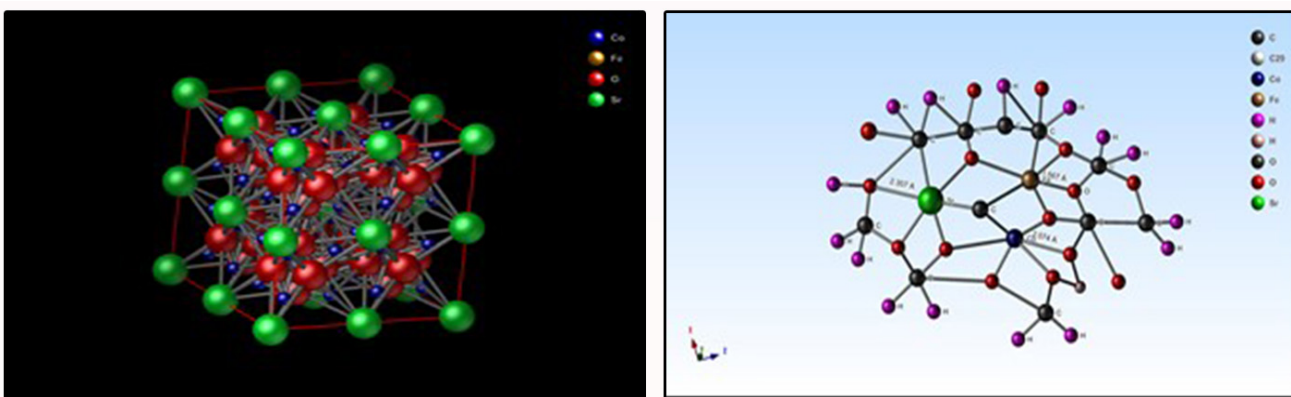

*Supplementary Figure 5: The optimized geometry of the possible complexes.*

### 3. Supplementary Table

*Supplementary Table 1:* The surface characteristics (relative concentration) of the catalysts calculated from the XPS spectra

|                                                  | Surface concentration (proportion (Atomic %)) |       |       |       |       |       |
|--------------------------------------------------|-----------------------------------------------|-------|-------|-------|-------|-------|
| Material                                         | Sr 3d                                         | Fe 2p | Co 2p | Mn 2p | O 1s  | C 1s  |
| double-B-sites perovskite /carbon aerogel hybrid | 3.17                                          | 2.56  | 2.26  | 1.08  | 70.37 | 20.56 |

***Supplementary Table 2:*** Isotherm model parameters and correlation (and error analysis) coefficients

| Type of isotherms | CV | AY |
|-------------------|----|----|
|-------------------|----|----|

|                                                                |        |       |
|----------------------------------------------------------------|--------|-------|
| Langmuir Parameters                                            |        |       |
| $Q_{\max}$ (mg g <sup>-1</sup> )                               | 206    | 113.5 |
| $b$ (L mg <sup>-1</sup> )                                      | 0.79   | 0.23  |
| $R^2$                                                          | 0.99   | 0.97  |
| $X^2$                                                          | 253.16 | 893   |
| ARE                                                            | 15.83  | 46.9  |
| $\Delta q\%$                                                   | 70.97  | 12.5  |
| Freundlich parameters                                          |        |       |
| $k_f$ (mg g <sup>-1</sup> )/(mg L <sup>-1</sup> ) <sup>n</sup> | 0.45   | 0.14  |
| $n$                                                            | 0.89   | 0.55  |
| $R^2$                                                          | 0.98   | 0.92  |
| $X^2$                                                          | 16592  | 2153  |
| ARE                                                            | 860.16 | 122.6 |
| $\Delta q\%$                                                   | 109.44 | 60.9  |
| Dubinin–Radushkevich parameters                                |        |       |
| $Q_s$ (mg g <sup>-1</sup> )                                    | 12.73  | 4.46  |
| $k_{ad}$ (mol <sup>2</sup> kJ <sup>-2</sup> )                  | 7.4    | 1.4   |
| $R^2$                                                          | 0.98   | 0.99  |
| $X^2$                                                          | 5310   | 320   |

|                               |        |      |
|-------------------------------|--------|------|
| ARE                           | 261.28 | 4.19 |
| $\Delta q\%$                  | 110.90 | 9.7  |
| Temkin parameters             |        |      |
| $B_T$ (J mole <sup>-1</sup> ) | 45.9   | 24.9 |
| $K_T$ (L g <sup>-1</sup> )    | 24.1   | 20   |
| $b$ (L g <sup>-1</sup> )      | 58.24  | 44.8 |
| $R^2$                         | 0.95   | 0.99 |
| $X^2$                         | 22524  | 774  |
| ARE                           | 1206   | 8.16 |
| $\Delta q\%$                  | 111.33 | 10.6 |

**Supplementary Table 3:** Kinetic equation constants and correlation (and error analysis) coefficients at different concentrations

| Pseudo- first order Parameters   |           |       |       |       |       |           |       |       |       |       |
|----------------------------------|-----------|-------|-------|-------|-------|-----------|-------|-------|-------|-------|
|                                  | <b>CV</b> |       |       |       |       | <b>AY</b> |       |       |       |       |
| Various concentration (mg L-1)   | 5         | 15    | 20    | 30    | 40    | 5         | 15    | 20    | 30    | 40    |
| $Q_e$ (exp)(mg g <sup>-1</sup> ) | 4.9       | 9.81  | 19.68 | 21.61 | 29.55 | 3.59      | 7.9   | 17.3  | 21.82 | 26.11 |
| $K_1$ (min <sup>-1</sup> )       | 0.18      | 0.208 | 0.242 | 0.255 | 0.240 | 0.032     | 0.037 | 0.030 | 0.045 | 0.44  |
| $R^2$                            |           |       | 0.56  |       |       |           |       | 0.87  |       |       |
| $X^2$                            |           |       | 328   |       |       |           |       | 16.66 |       |       |
| ARE                              |           |       | 32.8  |       |       |           |       | 9.29  |       |       |
| $\Delta q\%$                     |           |       | 101.2 |       |       |           |       | 100.1 |       |       |
| Pseudo- second order parameters  |           |       |       |       |       |           |       |       |       |       |
|                                  | <b>CV</b> |       |       |       |       | <b>AY</b> |       |       |       |       |
| Various concentration (mg L-1)   | 5         | 15    | 20    | 30    | 40    | 5         | 15    | 20    | 30    | 40    |

|                                                  |           |       |       |       |       |           |       |       |       |       |
|--------------------------------------------------|-----------|-------|-------|-------|-------|-----------|-------|-------|-------|-------|
| $Q_e$ (exp)(mg g <sup>-1</sup> )                 | 4.9       | 9.81  | 19.68 | 24.61 | 29.5  | 3.59      | 7.9   | 17.3  | 21.82 | 26.11 |
| $K_2$ (g mg <sup>-1</sup> )/(min <sup>-1</sup> ) | 0.07      | 0.065 | 0.075 | 0.049 | 0.048 | 0.045     | 0.036 | 0.041 | 0.029 | 0.017 |
| $R^2$                                            |           |       | 0.66  |       |       |           |       | 0.86  |       |       |
| $X^2$                                            |           |       | 314   |       |       |           |       | 25.1  |       |       |
| ARE                                              |           |       | 22.2  |       |       |           |       | 14.2  |       |       |
| $\Delta q\%$                                     |           |       | 90    |       |       |           |       | 104.2 |       |       |
| Elovich parameters                               |           |       |       |       |       |           |       |       |       |       |
|                                                  | <b>CV</b> |       |       |       |       | <b>AY</b> |       |       |       |       |
| Various concentration (mg L <sup>-1</sup> )      | 5         | 15    | 20    | 30    | 40    | 5         | 15    | 20    | 30    | 40    |
| $\beta$ (g mg <sup>-1</sup> )                    | 1.01      | 0.99  | 0.78  | 0.65  | 0.42  | 0.76      | 0.79  | 0.59  | 0.11  | 0.08  |
| $R^2$                                            |           |       | 0.946 |       |       |           |       | 0.941 |       |       |
| $X^2$                                            |           |       | 28.8  |       |       |           |       | 3.04  |       |       |
| ARE                                              |           |       | 2.76  |       |       |           |       | 0.26  |       |       |
| $\Delta q\%$                                     |           |       | 33    |       |       |           |       | 21.8  |       |       |

**Supplementary Table 4.** Rate-determining mechanism constants and correlation (and error analysis) coefficients

|                                        | <i>CV</i> | <i>AY</i> |
|----------------------------------------|-----------|-----------|
| <i>Intraparticle diffusion</i>         |           |           |
| $k_{int}$ ( $mg\ g^{-1}\ min^{-1/2}$ ) | 206       | 113.5     |
| $R^2$                                  | 0.99      | 0.98      |
| $X^2$                                  | 3893      | 50.2      |
| <i>ARE</i>                             | 206.87    | 8.94      |
| $\Delta q\%$                           | 74.2      | 35.5      |
| <i>Bangham model</i>                   |           |           |
| $R^2$                                  | 0.98      | 0.99      |
| $X^2$                                  | 276.2     | 174.5     |
| <i>ARE</i>                             | 14.45     | 10.44     |
| $\Delta q\%$                           | 75.8      | 69.8      |
| <i>Boyd model</i>                      |           |           |
| $R^2$                                  | 0.94      | 0.96      |
| $X^2$                                  | 6363      | 6137      |
| <i>ARE</i>                             | 315.1     | 365.6     |
| $\Delta q\%$                           | 106.4     | 107.5     |



**Supplementary Table 5.** The BET surface area, pore volume and mean pore diameters of synthesized catalysts (DB-Perovskite/CAG hybrid) and carbon aerogel (CAG) obtained using N<sub>2</sub> adsorption at 77 °K

| Catalysts                | BET surface area<br>(m <sup>2</sup> g <sup>-1</sup> ) | Pore volume<br>(cm <sup>3</sup> g <sup>-1</sup> ) | Mean pore diameter<br>(nm) |
|--------------------------|-------------------------------------------------------|---------------------------------------------------|----------------------------|
| Carbon Aerogel           | 714.93                                                | 1.16                                              | 11.51                      |
| DB-Perovskite            | 22.681                                                | 0.312                                             | 24.86                      |
| DB-Perovskite/CAG Hybrid | 390.23                                                | 0.75                                              | 16.51                      |

**Supplementary Table 6.** The mass ratios of the DB-Perovskite/CAG hybrid adsorbent

| Elt | Line | Error  | W%     | Absorption (A %) |
|-----|------|--------|--------|------------------|
| Mn  | Ka   | 0.7353 | 12.40  | 14.61            |
| Fe  | Ka   | 0.7353 | 27.17  | 31.48            |
| Co  | Ka   | 0.7353 | 25.76  | 28.30            |
| Sr  | La   | 1.0493 | 34.67  | 25.61            |
|     |      |        | 100.00 | 100.00           |

**Supplementary Table 7.** The probable bonding of DB-Perovskite/CAg hybrid

| Rank | Bond | d [Å]   | d-Ratio |
|------|------|---------|---------|
| 1    | Fe O | 0.82265 | 0.43298 |
| 2    | Fe O | 0.82265 | 0.43298 |
| 3    | Fe O | 0.82265 | 0.43298 |
| 4    | Fe O | 0.82265 | 0.43298 |
| 5    | Fe O | 0.82265 | 0.43298 |
| 6    | Fe O | 0.82265 | 0.43298 |
| 7    | Fe O | 0.82265 | 0.43298 |
| 8    | Fe O | 0.82265 | 0.43298 |
| 9    | Fe O | 0.82265 | 0.43298 |
| 10   | Fe O | 0.82265 | 0.43298 |
| 11   | Fe O | 0.82265 | 0.43298 |
| 12   | Fe O | 0.82265 | 0.43298 |
| 13   | Fe O | 0.82265 | 0.43298 |
| 14   | Fe O | 0.82265 | 0.43298 |
| 15   | Fe O | 0.82265 | 0.43298 |
| 16   | Fe O | 0.82265 | 0.43298 |
| 17   | Fe O | 0.82265 | 0.43298 |
| 18   | Fe O | 0.82265 | 0.43298 |
| 19   | Fe O | 0.82265 | 0.43298 |
| 20   | Fe O | 0.82265 | 0.43298 |
| 21   | Fe O | 0.82265 | 0.43298 |
| 22   | Fe O | 0.82265 | 0.43298 |
| 23   | Fe O | 0.82265 | 0.43298 |
| 24   | Fe O | 0.82265 | 0.43298 |
| 25   | Fe O | 2.28378 | 1.20199 |
| 26   | Fe O | 2.28378 | 1.20199 |
| 27   | Fe O | 2.28378 | 1.20199 |
| 28   | Fe O | 2.28378 | 1.20199 |
| 29   | Fe O | 2.28378 | 1.20199 |
| 30   | Fe O | 2.28378 | 1.20199 |
| 31   | Fe O | 2.28378 | 1.20199 |
| 32   | Fe O | 2.28378 | 1.20199 |
| 33   | Fe O | 2.28378 | 1.20199 |
| 34   | Fe O | 2.28378 | 1.20199 |
| 35   | Fe O | 2.28378 | 1.20199 |
| 36   | Fe O | 2.28378 | 1.20199 |
| 37   | Fe O | 2.28378 | 1.20199 |
| 38   | Fe O | 2.28378 | 1.20199 |
| 39   | Fe O | 2.28378 | 1.20199 |
| 40   | Fe O | 2.28378 | 1.20199 |
| 41   | Fe O | 2.28378 | 1.20199 |
| 42   | Fe O | 2.28378 | 1.20199 |
| 43   | Fe O | 2.28378 | 1.20199 |
| 44   | Fe O | 2.28378 | 1.20199 |
| 45   | Fe O | 2.28378 | 1.20199 |
| 46   | Fe O | 2.28378 | 1.20199 |

|    |      |         |         |
|----|------|---------|---------|
| 47 | Fe O | 2.28378 | 1.20199 |
| 48 | Fe O | 2.28378 | 1.20199 |
| -  | -    | -       | -       |
| 1  | Co O | 1.06967 | 0.61124 |
| 2  | Co O | 1.06967 | 0.61124 |
| 3  | Co O | 1.06967 | 0.61124 |
| 4  | Co O | 1.06967 | 0.61124 |
| 5  | Co O | 1.06967 | 0.61124 |
| 6  | Co O | 1.06967 | 0.61124 |
| 7  | Co O | 1.12856 | 0.64489 |
| 8  | Co O | 1.12856 | 0.64489 |
| 9  | Co O | 1.12856 | 0.64489 |
| 10 | Co O | 1.12856 | 0.64489 |
| 11 | Co O | 1.12856 | 0.64489 |
| 12 | Co O | 1.12856 | 0.64489 |
| 13 | Co O | 1.84761 | 1.05578 |
| 14 | Co O | 1.84761 | 1.05578 |
| 15 | Co O | 1.84761 | 1.05578 |
| 16 | Co O | 1.84761 | 1.05578 |
| 17 | Co O | 1.84761 | 1.05578 |
| 18 | Co O | 1.84761 | 1.05578 |
| 19 | Co O | 1.88231 | 1.07561 |
| 20 | Co O | 1.88231 | 1.07561 |
| 21 | Co O | 1.88231 | 1.07561 |
| 22 | Co O | 1.88231 | 1.07561 |
| 23 | Co O | 1.88231 | 1.07561 |
| 24 | Co O | 1.88231 | 1.07561 |
| 25 | Co O | 1.92230 | 1.09846 |
| 26 | Co O | 1.92230 | 1.09846 |
| 27 | Co O | 1.92230 | 1.09846 |
| 28 | Co O | 1.92230 | 1.09846 |
| 29 | Co O | 1.92230 | 1.09846 |
| 30 | Co O | 1.92230 | 1.09846 |
| 31 | Co O | 1.95568 | 1.11753 |
| 32 | Co O | 1.95568 | 1.11753 |
| 33 | Co O | 1.95568 | 1.11753 |
| 34 | Co O | 1.95568 | 1.11753 |
| 35 | Co O | 1.95568 | 1.11753 |
| 36 | Co O | 1.95568 | 1.11753 |
| 37 | Co O | 2.41563 | 1.38036 |
| 38 | Co O | 2.41563 | 1.38036 |
| 39 | Co O | 2.41563 | 1.38036 |
| 40 | Co O | 2.41563 | 1.38036 |
| 41 | Co O | 2.41563 | 1.38036 |
| 42 | Co O | 2.41563 | 1.38036 |
| 43 | Co O | 2.44228 | 1.39559 |
| 44 | Co O | 2.44228 | 1.39559 |
| 45 | Co O | 2.44228 | 1.39559 |
| 46 | Co O | 2.44228 | 1.39559 |

|    |      |         |         |
|----|------|---------|---------|
| 47 | Co O | 2.44228 | 1.39559 |
| 48 | Co O | 2.44228 | 1.39559 |
| 49 | Co O | 2.46863 | 1.41065 |
| 50 | Co O | 2.46863 | 1.41065 |
| 51 | Co O | 2.46863 | 1.41065 |
| 52 | Co O | 2.46863 | 1.41065 |
| 53 | Co O | 2.46863 | 1.41065 |
| 54 | Co O | 2.46863 | 1.41065 |
| 55 | Co O | 2.49471 | 1.42555 |
| 56 | Co O | 2.49471 | 1.42555 |
| 57 | Co O | 2.49471 | 1.42555 |
| 58 | Co O | 2.49471 | 1.42555 |
| 59 | Co O | 2.49471 | 1.42555 |
| 60 | Co O | 2.49471 | 1.42555 |
| 61 | Co O | 2.84688 | 1.62679 |
| 62 | Co O | 2.84688 | 1.62679 |
| 63 | Co O | 2.84688 | 1.62679 |
| 64 | Co O | 2.84688 | 1.62679 |
| 65 | Co O | 2.84688 | 1.62679 |
| 66 | Co O | 2.84688 | 1.62679 |
| 67 | Co O | 2.86952 | 1.63973 |
| 68 | Co O | 2.86952 | 1.63973 |
| 69 | Co O | 2.86952 | 1.63973 |
| 70 | Co O | 2.86952 | 1.63973 |
| 71 | Co O | 2.86952 | 1.63973 |
| 72 | Co O | 2.86952 | 1.63973 |
| 73 | Co O | 2.89199 | 1.65481 |
| 74 | Co O | 2.89199 | 1.65481 |
| 75 | Co O | 2.89199 | 1.65481 |
| 76 | Co O | 2.89199 | 1.65481 |
| 77 | Co O | 2.89199 | 1.65481 |
| 78 | Co O | 2.89199 | 1.65481 |
| 79 | Co O | 2.89199 | 1.65481 |
| 80 | Co O | 2.89199 | 1.65481 |
| 81 | Co O | 2.89199 | 1.65481 |
| 82 | Co O | 2.89199 | 1.65481 |
| 83 | Co O | 2.89199 | 1.65481 |
| 84 | Co O | 2.89199 | 1.65481 |
| 85 | Co O | 2.91818 | 1.66531 |
| 86 | Co O | 2.91818 | 1.66531 |
| 87 | Co O | 2.91818 | 1.66531 |
| 88 | Co O | 2.91818 | 1.66531 |
| 89 | Co O | 2.91818 | 1.66531 |
| 90 | Co O | 2.91818 | 1.66531 |
| 91 | Co O | 2.91818 | 1.66531 |
| 92 | Co O | 2.91818 | 1.66531 |
| 93 | Co O | 2.91818 | 1.66531 |
| 94 | Co O | 2.91818 | 1.66531 |
| 95 | Co O | 2.91818 | 1.66531 |

|     |      |         |         |
|-----|------|---------|---------|
| 96  | Co O | 2.91818 | 1.66531 |
| 97  | Co O | 2.94027 | 1.68016 |
| 98  | Co O | 2.94027 | 1.68016 |
| 99  | Co O | 2.94027 | 1.68016 |
| 100 | Co O | 2.94027 | 1.68016 |
| 101 | Co O | 2.94027 | 1.68016 |
| 102 | Co O | 2.94027 | 1.68016 |
| 103 | Co O | 2.96220 | 1.69269 |
| 104 | Co O | 2.96220 | 1.69269 |
| 105 | Co O | 2.96220 | 1.69269 |
| 106 | Co O | 2.96220 | 1.69269 |
| 107 | Co O | 2.96220 | 1.69269 |
| -   | -    | -       | -       |
| 1   | Sr O | 2.28627 | 0.90366 |
| 2   | Sr O | 2.28627 | 0.90366 |
| 3   | Sr O | 2.28627 | 0.90366 |
| 4   | Sr O | 2.28627 | 0.90366 |
| 5   | Sr O | 2.28627 | 0.90366 |
| 6   | Sr O | 2.28627 | 0.90366 |
| 7   | Sr O | 2.28627 | 0.90366 |
| 8   | Sr O | 2.28627 | 0.90366 |
| 9   | Sr O | 2.28627 | 0.90366 |
| 10  | Sr O | 2.28627 | 0.90366 |
| 11  | Sr O | 2.28627 | 0.90366 |
| 12  | Sr O | 2.28627 | 0.90366 |
| 13  | Sr O | 2.28627 | 0.90366 |
| 14  | Sr O | 2.28627 | 0.90366 |
| 15  | Sr O | 2.28627 | 0.90366 |
| 16  | Sr O | 2.28627 | 0.90366 |
| 17  | Sr O | 2.28627 | 0.90366 |
| 18  | Sr O | 2.28627 | 0.90366 |
| 19  | Sr O | 2.28627 | 0.90366 |
| 20  | Sr O | 2.28627 | 0.90366 |
| 21  | Sr O | 2.28627 | 0.90366 |
| 22  | Sr O | 2.28627 | 0.90366 |
| 23  | Sr O | 2.28627 | 0.90366 |
| 24  | Sr O | 2.28627 | 0.90366 |
| 25  | Sr O | 2.28627 | 0.90366 |
| 26  | Sr O | 2.28627 | 0.90366 |
| 27  | Sr O | 2.28627 | 0.90366 |
| 28  | Sr O | 2.28627 | 0.90366 |
| 29  | Sr O | 2.28627 | 0.90366 |
| 30  | Sr O | 2.28627 | 0.90366 |
| 31  | Sr O | 2.28627 | 0.90366 |
| 32  | Sr O | 2.28627 | 0.90366 |
| 33  | Sr O | 2.28627 | 0.90366 |
| 34  | Sr O | 2.28627 | 0.90366 |
| 35  | Sr O | 2.28627 | 0.90366 |
| 36  | Sr O | 2.28627 | 0.90366 |

|    |      |         |         |
|----|------|---------|---------|
| 37 | Sr O | 2.28627 | 0.90366 |
| 38 | Sr O | 2.28627 | 0.90366 |
| 39 | Sr O | 2.28627 | 0.90366 |
| 40 | Sr O | 2.28627 | 0.90366 |
| 41 | Sr O | 2.28627 | 0.90366 |
| 42 | Sr O | 2.28627 | 0.90366 |
| 43 | Sr O | 2.28627 | 0.90366 |
| 44 | Sr O | 2.28627 | 0.90366 |
| 45 | Sr O | 2.28627 | 0.90366 |
| 46 | Sr O | 2.28627 | 0.90366 |
| 47 | Sr O | 2.28627 | 0.90366 |
| 48 | Sr O | 2.28627 | 0.90366 |
| 49 | Sr O | 2.34220 | 0.92577 |
| 50 | Sr O | 2.34220 | 0.92577 |
| 51 | Sr O | 2.34220 | 0.92577 |
| 52 | Sr O | 2.34220 | 0.92577 |
| 53 | Sr O | 2.34220 | 0.92577 |
| 54 | Sr O | 2.34220 | 0.92577 |
| 55 | Sr O | 2.34220 | 0.92577 |
| 56 | Sr O | 2.34220 | 0.92577 |
| 57 | Sr O | 2.34220 | 0.92577 |
| 58 | Sr O | 2.34220 | 0.92577 |
| 59 | Sr O | 2.34220 | 0.92577 |
| 60 | Sr O | 2.34220 | 0.92577 |
| 61 | Sr O | 2.34220 | 0.92577 |
| 62 | Sr O | 2.34220 | 0.92577 |
| 63 | Sr O | 2.34220 | 0.92577 |
| 64 | Sr O | 2.34220 | 0.92577 |
| 65 | Sr O | 2.34220 | 0.92577 |
| 66 | Sr O | 2.34220 | 0.92577 |
| 67 | Sr O | 2.34220 | 0.92577 |
| 68 | Sr O | 2.34220 | 0.92577 |
| 69 | Sr O | 2.34220 | 0.92577 |
| 70 | Sr O | 2.34220 | 0.92577 |
| 71 | Sr O | 2.34220 | 0.92577 |
| 72 | Sr O | 2.34220 | 0.92577 |
| 73 | Sr O | 2.34220 | 0.92577 |
| 74 | Sr O | 2.34220 | 0.92577 |
| 75 | Sr O | 2.34220 | 0.92577 |
| 76 | Sr O | 2.34220 | 0.92577 |
| 77 | Sr O | 2.34220 | 0.92577 |
| 78 | Sr O | 2.34220 | 0.92577 |
| 79 | Sr O | 2.34220 | 0.92577 |
| 80 | Sr O | 2.34220 | 0.92577 |
| 81 | Sr O | 2.34220 | 0.92577 |
| 82 | Sr O | 2.34220 | 0.92577 |
| 83 | Sr O | 2.34220 | 0.92577 |
| 84 | Sr O | 2.34220 | 0.92577 |
| 85 | Sr O | 2.34220 | 0.92577 |

|    |      |         |         |
|----|------|---------|---------|
| 86 | Sr O | 2.34220 | 0.92577 |
| 87 | Sr O | 2.34220 | 0.92577 |
| 88 | Sr O | 2.34220 | 0.92577 |
| 89 | Sr O | 2.34220 | 0.92577 |
| 90 | Co O | 2.34220 | 0.92577 |
| 91 | Co O | 2.34220 | 0.92577 |
| 92 | Co O | 2.34220 | 0.92577 |
| 93 | Co O | 2.34220 | 0.92577 |
| 94 | Co O | 2.34220 | 0.92577 |
| 95 | Co O | 2.34220 | 0.92577 |
| 96 | Co O | 2.34220 | 0.92577 |

**Supplementary Table 8.** The characteristics of DB-Perovskite/CAg hybrid by Modified Pechini sol-gel obtained X-ray diffraction (XRD, STOE-STADV) that was accompanied by Cu-K $\alpha$  Monochromatic Radiation ( $\lambda = 1.54060 \text{ \AA}$ ) in a voltage of 40Kv and 40 mA electricity flow.

| 2 $\theta$               | hkl <sup>1</sup>               | FWHM <sup>2</sup> ( $\beta$ )                             | Size of crystal <sup>3</sup> (nm) | d-spacing <sup>4</sup> (nm) |
|--------------------------|--------------------------------|-----------------------------------------------------------|-----------------------------------|-----------------------------|
| 32.80                    | 110                            | 0.0036                                                    | 40.76                             | 0.272                       |
| 44.33                    | 111                            | 0.0045                                                    | 33.8                              | 0.204                       |
| 58.59                    | 220                            | 0.0036                                                    | 44.2                              | 0.157                       |
| 64.47                    | 300                            | 0.0051                                                    | 32.2                              | 0.144                       |
| 68.73                    | 311                            | 0.0036                                                    | 44.8                              | 0.136                       |
|                          | $V_{lattice} (\text{\AA}^3)^5$ | $V_{atomic} (\text{cm}^3/\text{mol})$ of Sr <sup>2+</sup> | Lattice parameters                |                             |
| DB-Perovskite/CAg Hybrid | 174.11                         | 33.72                                                     | a = 5.52                          |                             |

<sup>1</sup>Miller index    <sup>2</sup>Full width at half maximum    <sup>3</sup>to calculate the size of adsorbent (crystalline size), Scherrer equation was used    <sup>4</sup>inter-atomic spacing    <sup>5</sup> cell lattice volume

## **References:**

- S1) Hasan Z, Cho DW, Nam IH, Chon CM, Song H. Preparation of calcined zirconia-carbon composite from metal organic frameworks and its application to adsorption of crystal violet and salicylic acid. *Materials*. 2016 Apr; 9(4):261.
- S2) Chen X, Chin CJ. Adsorption and desorption of crystal violet and basic red 9 by multi-walled carbon nanotubes. *Water Science and Technology*. 2019 Apr 15; 79(8):1541-9.
- S3) Cheruiyot GK, Wanyonyi WC, Kiplimo JJ, Maina EN. Adsorption of toxic crystal violet dye using coffee husks: equilibrium, kinetics and thermodynamics study. *Scientific African*. 2019 Sep 1; 5:e00116.
- S4) Elella MH, Sabaa MW, ElHafeez EA, Mohamed RR. Crystal violet dye removal using crosslinked grafted xanthan gum. *International journal of biological macromolecules*. 2019 Sep 15; 137:1086-101.
- S5) Brião GV, Jahn SL, Foletto EL, Dotto GL. Adsorption of crystal violet dye onto a mesoporous ZSM-5 zeolite synthesized using chitin as template. *Journal of colloid and interface science*. 2017 Dec 15; 508:313-22.
- S6) Sabna V, Thampi SG, Chandrakaran S. Adsorption of crystal violet onto functionalised multi-walled carbon nanotubes: equilibrium and kinetic studies. *Ecotoxicology and environmental safety*. 2016 Dec 1; 134:390-7.
- S7) Doke KM, Yusufi M, Joseph RD, Khan EM. Comparative adsorption of crystal violet and congo red onto ZnCl<sub>2</sub> activated carbon. *Journal of Dispersion Science and Technology*. 2016 Nov 1; 37(11):1671-81.
- S8) Miyah Y, Lahrichi A, Idrissi M, Boujraf S, Taouda H, Zerrouq F. Assessment of adsorption kinetics for removal potential of Crystal Violet dye from aqueous solutions using Moroccan pyrophyllite. *Journal of the Association of Arab Universities for Basic and Applied Sciences*. 2017 Jun 1; 23(1):20-8.
- S9) Garg D, Kumar S, Sharma K, Majumder CB. Application of waste peanut shells to form activated carbon and its utilization for the removal of Acid Yellow 36 from wastewater. *Groundwater for Sustainable Development*. 2019 Apr 1; 8:512-9.
- S10) Jedynak K, Wideł D, Rędzia N. Removal of rhodamine b (a basic dye) and acid yellow 17 (an acidic dye) from aqueous solutions by ordered mesoporous carbon and commercial activated carbon. *Colloids and Interfaces*. 2019 Mar; 3(1):30.
- S11) Njoku VO, Foo KY, Asif M, Hameed BH. Preparation of activated carbons from rambutan (*Nephelium lappaceum*) peel by microwave-induced KOH activation for acid yellow 17 dye adsorption. *Chemical Engineering Journal*. 2014 Aug 15; 250:198-204.
